# Supplementary material for: Parvovirus B19 and Human Parvovirus 4 Encode a Homologous “X Protein” in a Reading Frame Overlapping the VP1 Capsid Gene: A VP1/X Overlap in Parvovirus B19 and PARV4
Source: Preprints.org preprint supplement (doi:10.20944/preprints202004.0064.v2), 2023-09-15

S3

A. Splicing profile of Parvovirus B19

P6: promoter  
D1, D2: splicing donor sites  
A1-1, A1-2, A2-1, A2-2: splicing acceptor sites  
pAp1, pAp: proximal poly-adenylation sites  
pAd: distal poly-adenylation site

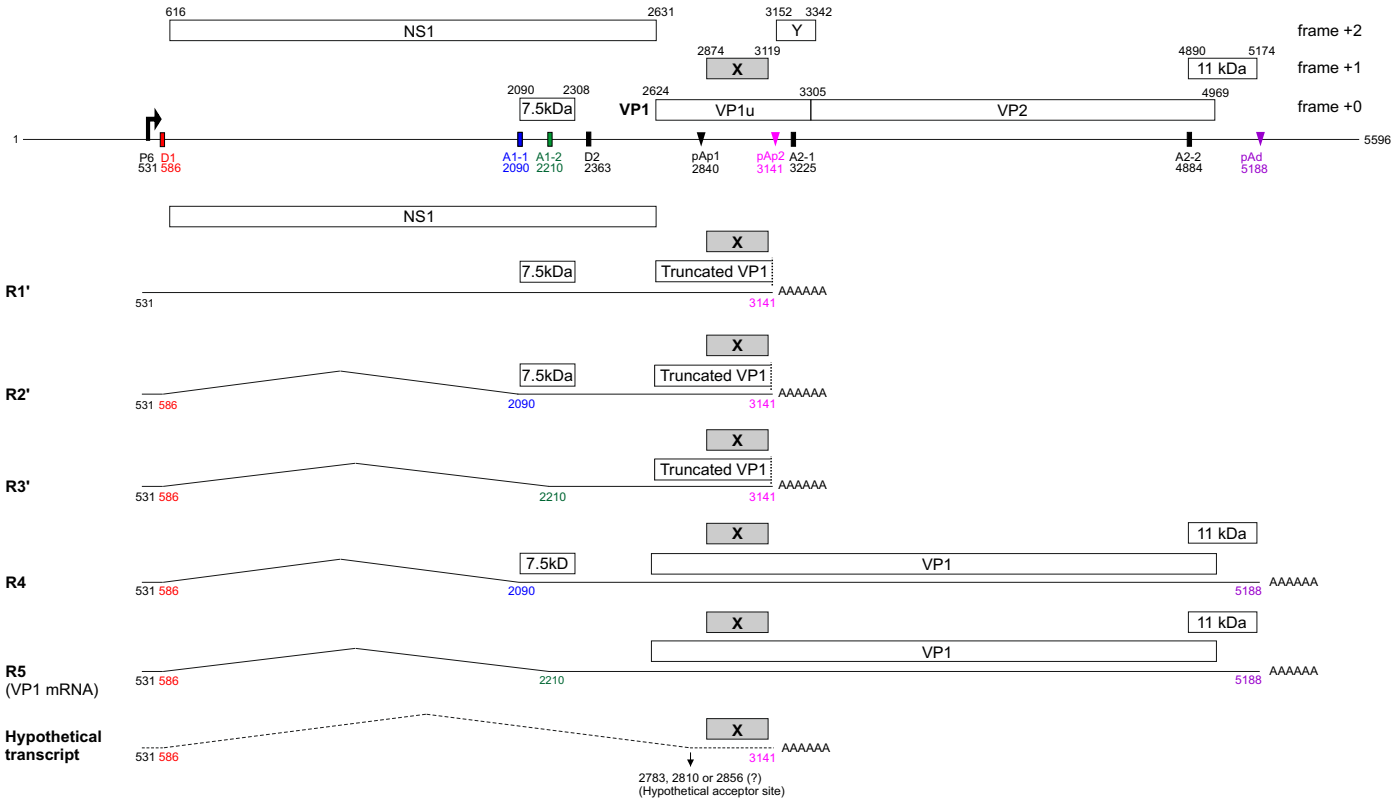

B. Splicing profile of Human parvovirus 4

P6, P38: promoters  
D1, D2, D3, D3m: splicing donor sites  
A1, A2, A3: splicing acceptor sites  
pA: poly-adenylation site

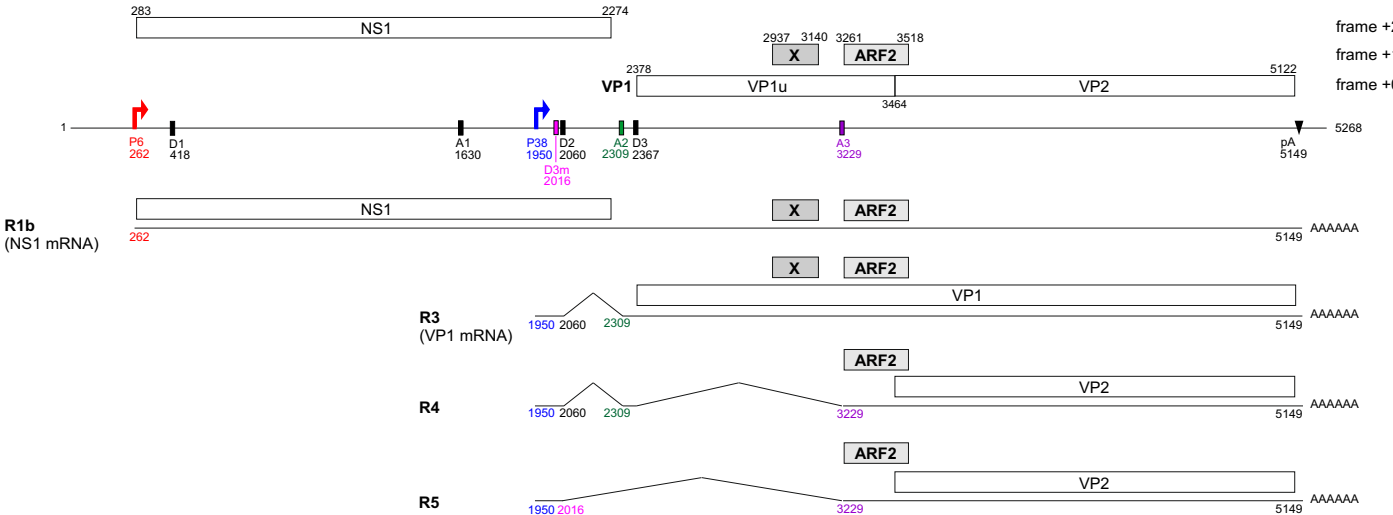

Supplement: Supplementary file 3 [file supplementary]
