# Supplementary figures and images for: Parvovirus B19 and Human Parvovirus 4 Encode a Homologous “X Protein” in a Reading Frame Overlapping the VP1 Capsid Gene: A VP1/X Overlap in Parvovirus B19 and PARV4
Source: Preprints.org preprint supplement (doi:10.20944/preprints202004.0064.v2), 2023-09-15

Z protein

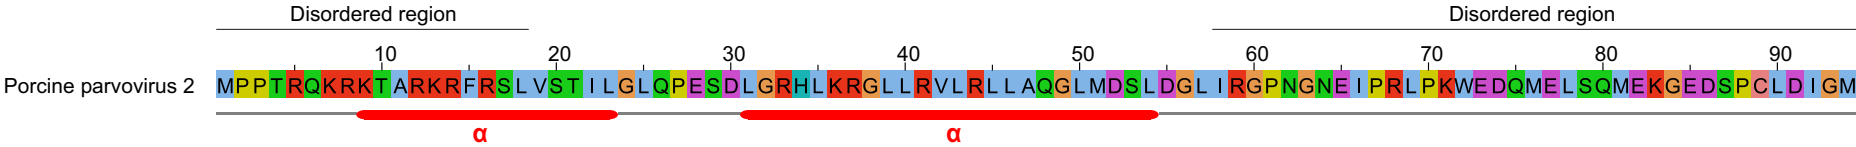

Supplement: Supplementary file 1 [file supplementary]

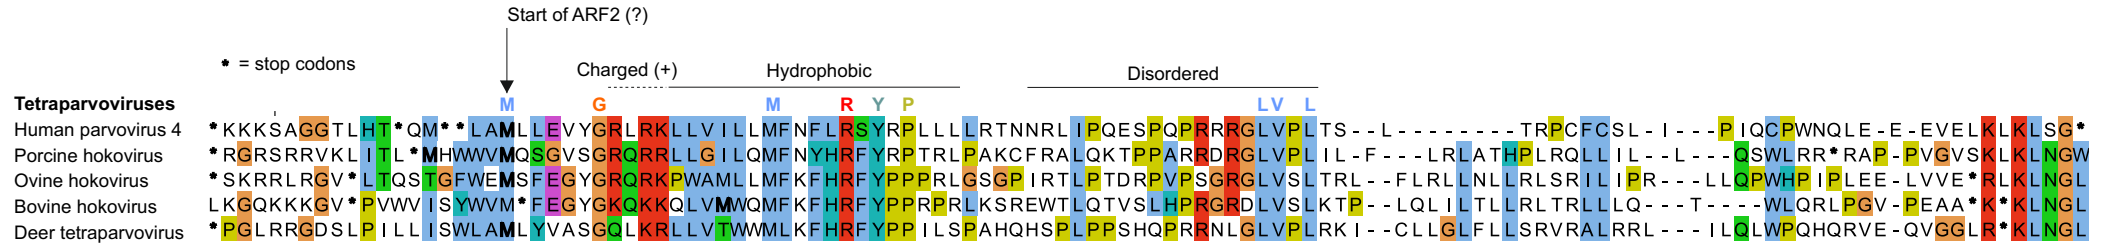

Supplement: Supplementary file 2 [file supplementary]
